1 **Co-circulation of two lineages of Oropouche virus in the Amazon basin, Colombia, 2024**

2

3 Jaime Usuga<sup>1</sup>, Daniel Limonta<sup>1</sup>, Laura S. Perez-Restrepo, Karl A. Ciuoderis, Isabel Moreno,  
4 Angela Arevalo, Vanessa Vargas, Michael G. Berg, Gavin A. Cloherty, Juan P. Hernandez-Ortiz,  
5 Jorge E. Osorio<sup>2</sup>

6 <sup>1</sup>These first authors contributed equally to this article, <sup>2</sup>Corresponding author

7

8 **Author affiliations:**

9 School of Veterinary Medicine, University of Wisconsin, Madison, Wisconsin, USA (D. Limonta,  
10 KA. Ciuoderis, JE. Osorio); Global Health Institute One Health Colombia, National University of  
11 Colombia, Medellin, Colombia (J. Usuga, LS. Perez-Restrepo, KA. Ciuoderis, I. Moreno, A.  
12 Arevalo, V. Vargas, JP. Hernandez-Ortiz, JE. Osorio); Infectious Diseases Research, Abbott  
13 Diagnostics and Abbott Pandemic Defense Coalition, Abbott Park, Illinois, USA (MG. Berg, GA.  
14 Cloherty); National University of Colombia, Medellín, Colombia (JP. Hernandez-Ortiz); Global  
15 Health Institute, University of Wisconsin, Madison, Wisconsin, USA (JE. Osorio)

16

17 **Abstract**

18 In early 2024, explosive outbreaks of Oropouche virus (OROV) linked to a novel viral lineage  
19 were documented in the Brazilian Amazon. Here, we report the introduction of this emerging  
20 orthobunyavirus into Colombia and its co-circulation with another OROV lineage. This  
21 investigation highlights the complex arbovirus dynamics in South America.

## 22 **Keywords**

23 Oropouche, Colombia, reassortment, fever, sequencing, outbreak, Leticia, lineages, Amazon.

24

25 Oropouche virus (OROV) is a reemerging arbovirus belonging to the *Orthobunyavirus*  
26 genus, *orthobunyavirus oropoucheense* species, of the family *Peribunyaviridae*. The three single-  
27 stranded, negative-sense RNA segments (L: Large, M: Medium, S: Small) of the OROV genome  
28 allow reassortments (1). Besides acute fever, OROV can cause meningitis and encephalitis. While  
29 biting midges, *Culicoides paraensis*, are the main vector of OROV in urban cycles, different insect  
30 species are vectors in sylvatic cycles. Vertebrates, such as primates, small mammals, and possibly  
31 birds, serve as reservoir hosts (1,2).

32 OROV has spread rapidly in South America causing over 500,000 infections (2,3). Most  
33 OROV cases have occurred in the Brazilian Amazon, where explosive outbreaks affecting  
34 sometimes thousands of inhabitants, have been reported after OROV identification in Trinidad and  
35 Tobago in 1955 (2,4,5). In a study conducted by our group in 2019-2021 in Colombia, we found  
36 that OROV and dengue virus (DENV) were responsible for over 10 and 20% of acute febrile  
37 illness, respectively, at four sites (Cúcuta, Cali, Villavicencio, and Leticia). The phylogenetic  
38 analysis revealed two separate OROV introductions into Colombia from bordering Ecuador  
39 (Cúcuta, Cali, and Villavicencio) and Peru (Leticia) (6).

40 In early February 2024, the PAHO/WHO issued an epidemiological alert because of the  
41 dramatic increase in OROV cases in four Amazonian states of Brazil (7). Over 1000 confirmed  
42 cases by RT-qPCR have been reported in the state of Amazonas alone between 2023 and January  
43 2024 (8). Brazilian authors recently shared in a pre-publication the sequence data of the OROV

44 causing this large-scale outbreak. After analyzing over 100 full-length genomes, they identified  
45 multiple reassortment events and concluded that this virus is a new lineage (OROV<sub>BR-2015-2023</sub>) (9).  
46 In this work, we are reporting the first OROV cases in Colombia caused by this newly identified  
47 viral lineage, which is co-circulating with another previously characterized OROV lineage (6).

## 48 **The Study**

49 In early January 2024, health authorities noticed a slight increase in acute febrile cases in  
50 the Leticia municipality, Amazonas department of Colombia, which has over 53,000 inhabitants.  
51 One-hundred and seventeen individuals complaining of chills (94.6%), headache (87.2%),  
52 arthralgia (65%), myalgia (41%), diarrhea (34.2%), fatigue (33.3%), and rash (6%) were treated  
53 at the emergency room of the Leticia hospital over five weeks. While fever ( $\geq 38.5^{\circ}\text{C}$ ) was  
54 confirmed at the doctor's office in >46% of patients, less than 3% presented respiratory  
55 symptoms. No hemorrhagic manifestations were present in the febrile patients, nor were severe  
56 illnesses or hospitalizations documented among the studied individuals. Cases were between 7  
57 and 92- years -old. Sixty individuals were male, and fifty-seven were female. After obtaining the  
58 written consent from adults and children's parents (or legal guardians), serum samples were  
59 collected. The protocol for this study was approved by the ethics committee of the Corporacion  
60 de Investigaciones Biologicas (SC-6230-1).

61 Frozen serum samples were shipped by air over 1300 km to One Health Colombia,  
62 located in Medellin city. One Health Colombia is a center established between the Global Health  
63 Institute at the University of Wisconsin-Madison and the National University of Colombia-  
64 Medellin. Following the center guidelines at One Health Colombia (6), serum samples were  
65 tested for arboviruses (zika virus or ZIKV, mayaro virus or MAYV, chikungunya virus or

66 CHIKV, DENV, OROV), hepatitis B and C viruses, *Leptospira* spp., and *Plasmodium* spp. using  
67 published and Abbott (Illinois, US) protocols (see **Appendix** and references therein).

68 DENV genome was detected by ZCD (zika, chikungunya, dengue) Trioplex real-time RT-  
69 qPCR in eight samples, which were also DENV non-structural protein 1 positive (N=4) or anti-  
70 DENV IgM positive (N=3). The study population had a high anti-DENV IgG prevalence of  
71 77.7% (N=117). All samples were negative for ZIKV, CHIKV, and MAYV RNA. Seven samples  
72 presented *Plasmodium* spp. DNA by qPCR, with five samples showing positivity for the *P. vivax*  
73 antigen. No samples were positive for hepatitis B virus surface Ag, anti-hepatitis C virus  
74 antibody, and *Leptospira* spp. DNA.

75 Using our recently designed OROV RT-qPCR assay (6), OROV RNA of L and M  
76 segments were detected in eight samples. Next, NGS sequencing was conducted using  
77 metagenomic and target enrichment approaches in these eight serum specimens, as described  
78 previously (6). Phylogenetic analysis using available OROV genomes and the sequences of the  
79 new Brazilian clade, OROV<sub>BR-2015-2023</sub> (9,10), revealed its presence in two samples from Leticia,  
80 LET-2099 and LET-2102 (**Figure 1**). While the L and S segments each branch as paraphyletic  
81 clades basal to OROV<sub>PE/CO/EC-2008-2021</sub>, its M segment is more closely related to OROV<sub>BR-2009-2018</sub>  
82 sequences. Amino acid changes of this new lineage compared to ancestral viral strains indicated  
83 multiple mutations in L and M segments (**Appendix**). In addition, six samples were detected  
84 from the OROV<sub>PE-CO-EC/2008-2021</sub> lineage recently reported as circulating in 2019-2021 in  
85 Colombia (6) (**Table**). OROV cases did not exhibit co-infections aside from clinical  
86 manifestations of acute undifferentiated fever (**Appendix**) and they had not traveled outside of  
87 the Leticia municipality and its surrounding areas in the previous two weeks (**Figure 2**). Six full-



88 length genomes of OROV analyzed in this work, including the two novel OROV, were deposited  
89 in the GenBank under accession numbers PP477303-PP477320.

## 90 **Conclusions**

91 In the present cross-sectional study, we are reporting for the first time the circulation in  
92 Colombia of OROV<sub>BR-2015-2023</sub>, a novel orthobunyavirus that was very recently documented in  
93 Brazil (9,10). Thus, this is the first report of the newly identified lineage of OROV outside  
94 Brazil. Given the numerous mutations in RdRp and glycoproteins for OROV<sub>BR-2015-2023</sub>,  
95 enhanced replication and immune evasion capabilities likely increase viral fitness and  
96 transmission. In addition, we detected in six patients the co-circulation of an OROV lineage  
97 identified previously by our group in Colombia (6).

98 The identification of co-circulating strains of OROV exemplifies the evolving nature of  
99 orthobunyaviruses and raises concerns about future reassortment events and the emergence of  
100 new lineages with more severe clinical phenotypes and enhanced vector competence. In an  
101 arbovirus hotspot such as Leticia, it is not known if cross-protective immunity will exist between  
102 these two OROV lineages. Previously, a reassortant OROV isolated from outbreaks in Iquitos,  
103 the largest city in the Peruvian Amazon, provided limited cross-protection against an OROV  
104 strain (11).

105 Leticia municipality, the southernmost region in Colombia (**Figure 2**), remains isolated  
106 from the rest of Colombia's road network, and thus travelers typically reach Leticia by air. The  
107 capital of the Colombian Amazonas department, Leticia city, is in Leticia municipality where the  
108 borders of Colombia, Brazil, and Peru converge, forming an area known as the Three Borders.  
109 Tabatinga city, in the Brazilian state of Amazonas, is located right across from Leticia city

110 forming a unique suburban area nearby the Peruvian city of Santa Rosa de Yavarí, which is on an  
111 island in the Amazon River (12). Due to the significant human mobility related to local  
112 businesses, it is very likely that the new OROV lineage is spreading rapidly in these borderlands.  
113 Furthermore, we believe that the novel OROV in Leticia came from either a nearby settlement or  
114 air travelers from the Brazilian Amazon, where persistent outbreaks are occurring.

115 Our One Health center has previously reported outbreaks of ZIKV (13), DENV (14),  
116 OROV (6), and more recently has detected yellow fever virus (unpub. data) and MAYV (15) in  
117 Colombia, which underscores the dynamic landscape of reemerging arboviruses in this region.  
118 The sustained transmission of established strains and the unpredictable reassortment events of  
119 OROV able to cause outbreaks as described here is yet another demonstration of the public  
120 health challenges of surveillance, prevention, and control of arbovirus reemergence in the  
121 Americas.

122

## 123 **Acknowledgments**

124 We would like to thank the clinical and laboratory staff of the health-care institutions from  
125 Leticia city (Hospital San Rafael de Leticia, and Fundación Clínica Leticia) for their  
126 participation in our study. We also thank the staff of One Health Colombia, particularly the  
127 laboratory personnel, for their support in this work. Juan P. Hernandez-Ortiz and Laura S. Perez-  
128 Restrepo express their gratitude to Fundación Fraternidad Medellín and Fundación Sofia Perez  
129 de Soto for their unwavering support for the One Health Ph.D. awards. We are grateful for the  
130 map of the Leticia municipality in the Amazon basin, Colombia, generated by Celeny Ortiz  
131 Restrepo from One Health Colombia. This research was supported by the Global Health Institute

132 of the University of Wisconsin-Madison, the National University of Colombia-Medellin, and the  
133 virus discovery research program of the Abbott Pandemic Defense Coalition (APDC).

134

## 135 **References**

- 136 1. Wessellmann KM, Postigo-Hidalgo I, Pezzi L, de Oliveira-Filho EF, Fischer C, de  
137 Lamballerie X, et al. Emergence of Oropouche fever in Latin America: a narrative  
138 review. *Lancet Infect Dis*. 2024 Jan 25;
- 139 2. Pinheiro FP, Travassos da Rosa AP, Travassos da Rosa JF, Ishak R, Freitas RB, Gomes  
140 ML, et al. Oropouche virus. I. A review of clinical, epidemiological, and ecological  
141 findings. *Am J Trop Med Hyg*. 1981 Jan;30(1):149–60.
- 142 3. Forshey BM, Guevara C, Laguna-Torres VA, Cespedes M, Vargas J, Gianella A, et al.  
143 Arboviral etiologies of acute febrile illnesses in Western South America, 2000-2007.  
144 *PLoS Negl Trop Dis*. 2010 Aug 10;4(8):e787.
- 145 4. Anderson CR, Spence L, Downs WG, Aitken TH. Oropouche virus: a new human disease  
146 agent from Trinidad, West Indies. *Am J Trop Med Hyg*. 1961 Jul;10:574–8.
- 147 5. Azevedo RS da S, Nunes MRT, Chiang JO, Bensabath G, Vasconcelos HB, Pinto AY das  
148 N, et al. Reemergence of Oropouche fever, northern Brazil. *Emerging Infect Dis*. 2007  
149 Jun;13(6):912–5.
- 150 6. Ciuderis KA, Berg MG, Perez LJ, Hadji A, Perez-Restrepo LS, Aristizabal LC, et al.  
151 Oropouche virus as an emerging cause of acute febrile illness in Colombia. *Emerg  
152 Microbes Infect*. 2022 Dec;11(1):2645–57.
- 153 7. Pan American Health Organization, World Health Organization. Epidemiological Alert:  
154 Oropouche in the Region of the Americas. Washington, D.C.; 2024 Feb.
- 155 8. Pan American Health Organization, World Health Organization. Public Health Risk  
156 Assessment related to Oropouche Virus (OROV) in the Region of the Americas.  
157 Washington, D.C.; 2024 Feb.
- 158 9. Iani FC de M, Mota Pereira F, de Oliveira EC, Nascimento Rodrigues JT, Hoffmann  
159 Machado M, Fonseca V, et al. Rapid spatial Expansion Beyond the Amazon Basin:  
160 Oropouche Virus joins other main arboviruses in epidemic activity across the Americas.  
161 *medRxiv*. 2024 Aug 4;

- 162 10. Naveca FG, de Almeida TAP, Souza V, Nascimento V, Silva D, Nascimento F, et al.  
 163 Emergence of a novel reassortant Oropouche virus drives persistent human outbreaks in  
 164 the Brazilian Amazon region from 2022 to 2024. medRxiv. 2024 Jul 24;
- 165 11. Aguilar PV, Barrett AD, Saeed MF, Watts DM, Russell K, Guevara C, et al. Iquitos  
 166 virus: a novel reassortant Orthobunyavirus associated with human illness in Peru. PLoS  
 167 Negl Trop Dis. 2011 Sep 20;5(9):e1315.
- 168 12. Farnsworth-Alvear A, Palacios M, López AMG, editors. The colombia reader: history,  
 169 culture, politics. Duke University Press; 2016.
- 170 13. Camacho E, Paternina-Gomez M, Blanco PJ, Osorio JE, Aliota MT. Detection of  
 171 autochthonous zika virus transmission in sincelejo, colombia. Emerging Infect Dis. 2016  
 172 May;22(5):927–9.
- 173 14. Ciuoderis KA, Usuga J, Moreno I, Perez-Restrepo LS, Flórez DY, Cardona A, et al.  
 174 Characterization of dengue virus serotype 2 cosmopolitan genotype circulating in  
 175 colombia. Am J Trop Med Hyg. 2023 Dec 6;109(6):1298–302.
- 176 15. Perez-Restrepo LS, Ciuoderis K, Usuga J, Moreno I, Vargas V, Arévalo-Arbelaez AJ, et  
 177 al. Mayaro Virus as the cause of Acute Febrile Illness in the Colombian Amazon Basin.  
 178 Front Microbiol. 2024 Jul 9;15:1419637.

179  
 180 **Table.** Case identification, demographic information, blood sampling date, and OROV clades of  
 181 the eight febrile cases with OROV in Leticia, Colombia, 2024.

| ID*       | Sex    | Sampling date | Ct value | OROV† clade                        |
|-----------|--------|---------------|----------|------------------------------------|
| LET‡-2040 | Male   | 2024 Jan      | 32.9     | OROV <sub>PE-CO-EC/2008-2021</sub> |
| LET-2083  | Male   | 2024 Feb      | 28.6     | OROV <sub>PE-CO-EC/2008-2021</sub> |
| LET-2088  | Male   | 2024 Feb      | 31.5     | OROV <sub>PE-CO-EC/2008-2021</sub> |
| LET-2093  | Female | 2024 Feb      | 33.2     | OROV <sub>PE-CO-EC/2008-2021</sub> |
| LET-2099  | Male   | 2024 Feb      | 28.7     | OROV <sub>BR-2015-2023</sub>       |
| LET-2102  | Male   | 2024 Feb      | 30.1     | OROV <sub>BR-2015-2023</sub>       |
| LET-2116  | Female | 2024 Feb      | 34.2     | OROV <sub>PE-CO-EC/2008-2021</sub> |
| LET-2117  | Female | 2024 Feb      | 34.4     | OROV <sub>PE-CO-EC/2008-2021</sub> |

182 \*ID, identification.

183 †OROV, Oropouche virus.

184 ‡Let, Leticia.

185 **Figure 1.** Time-scaled Bayesian phylogeographic tree of Oropouche viruses from Colombia.  
186 Bayesian phylogenetic trees of L (left), M (center) and S (right) gene segments were estimated  
187 using Beast (Bayesian Markov-Chain Monte Carlo > 100,000,000 generations) and IQ-Tree in  
188 ModelFinder (ultrafast bootstrapping and 1,000 replicates). Best-fit model was selected  
189 according to Bayesian information criteria. Strict molecular clock model was used for L and S  
190 segments, while an uncorrelated relaxed molecular clock model was used for the M segment.  
191 The phylogeny branches are colored according to their descendant place of origin (figure key).  
192 Bayesian posterior values ( $\geq 0.8$ ) are annotated at specific nodes of the trees. Sequences from this  
193 study were compared to reference sequences from other studies. Main clusters are denoted with  
194 the following reference labels: BR 2015-2023 cluster represents the recent outbreak of the new  
195 lineage of OROV in Brazil from 2015 to 2023; PE/CO/EC 2008-2021 cluster represents  
196 sequences from Colombia, Peru, and Ecuador from 2008 to 2021; and BR 2009-2018 cluster  
197 represents sequences from Brazil from 2009 to 2018. Viruses from this study are represented by  
198 red circles with Let as the abbreviation of Leticia.

199

200 **Figure 2.** Map of the Leticia municipality and the Three Borders (Colombia, Peru, and Brazil) in  
201 the Amazon basin, Colombia. The map shows where the eight cases of OROV reside in the  
202 Leticia municipality. Yellow dots indicate cases with the newly identified OROV<sub>BR-2015-2023</sub>.  
203 Macedonia, Vereda Santa Sofia, Santa Rosa de Yavari, and Tabatinga correspond to indigenous  
204 communities or cities. Map generated using QGIS Version 3.36.0 RC (03/12/2024).

205

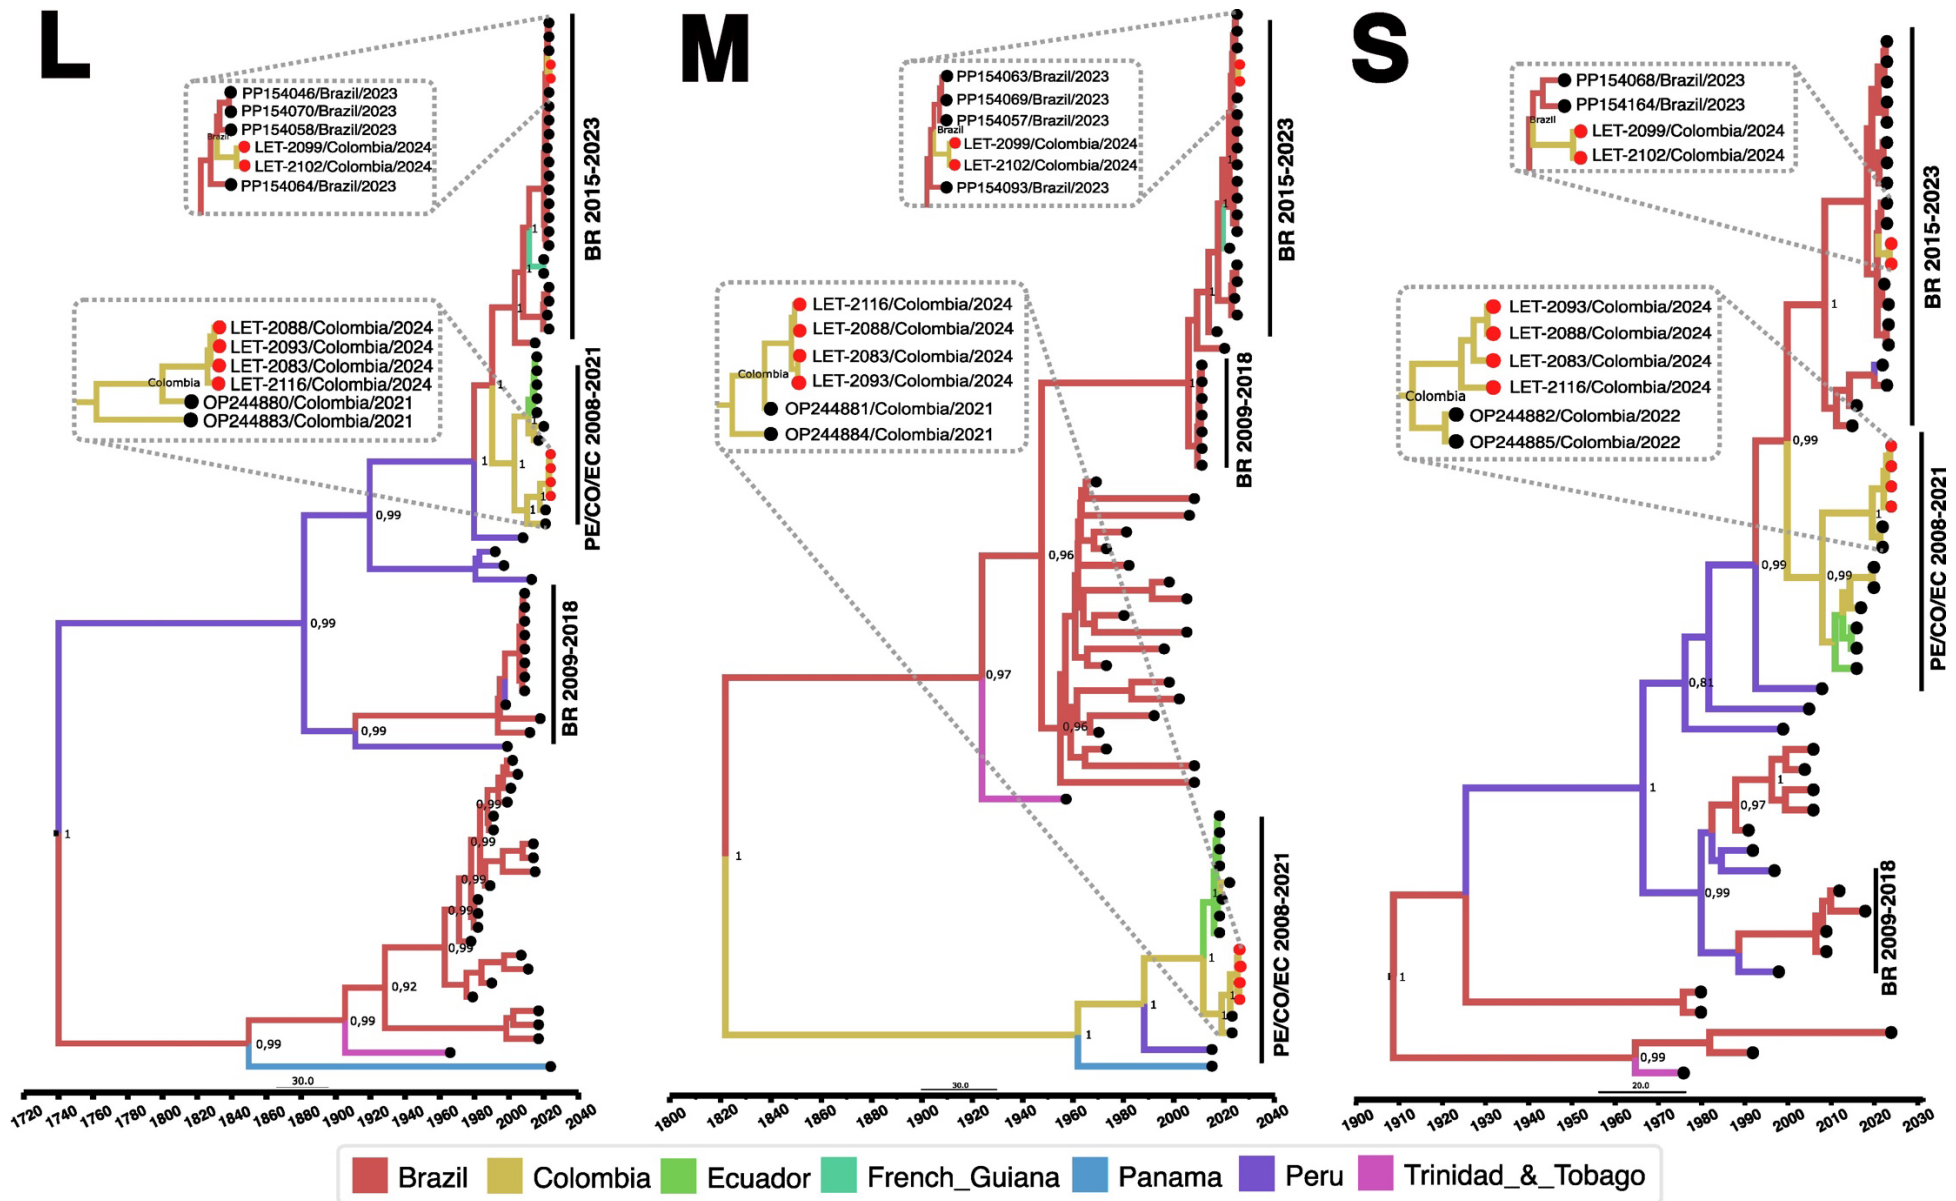

Figure 1.



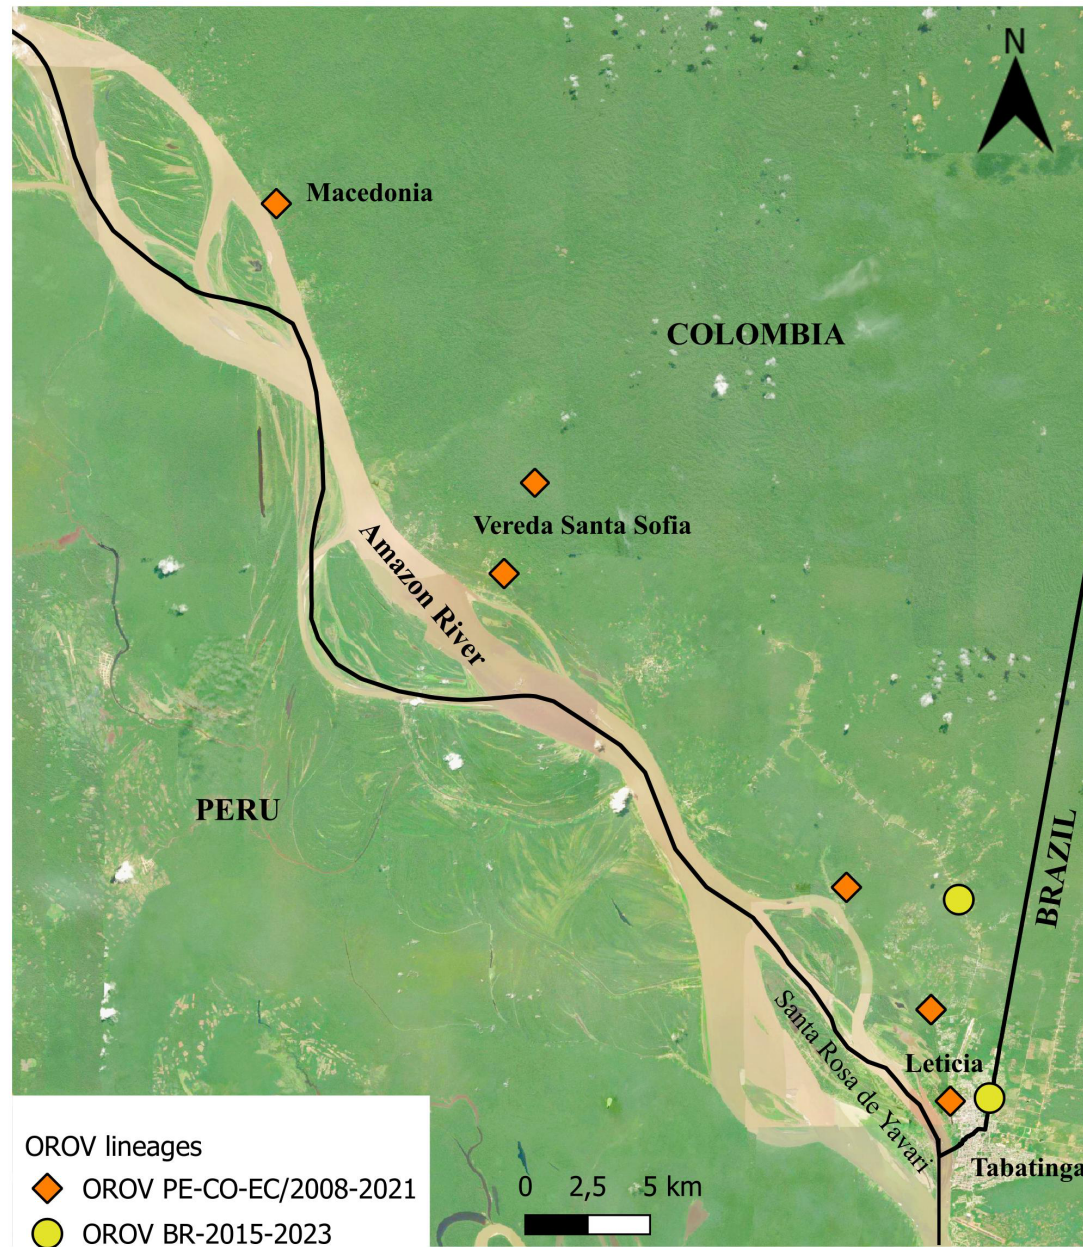

Figure 2.
