# Supplementary material for: Co-circulation of two lineages of Oropouche virus in the Amazon basin, Colombia, 2024
Source: bioRxiv or medRxiv preprint supplement (doi:10.1101/2024.09.04.24312892), 2024-09-08
Supplement: Supplementary file [file media-1.pdf]

**Table 1.** Protocols of microbiology assays performed at the One Health Colombia, 2024.

| Assay                           | Pathogen               | Protocol                                                                    |
|---------------------------------|------------------------|-----------------------------------------------------------------------------|
| Oropouche real-time RT-qPCR     | OROV                   | Ciuderis, et al. <i>Emerg. Microb &amp; Infec.</i> 2022 11:1, 2645-2657     |
| ZCD Triplex real-time RT-qPCR   | ZIKV, CHIKV, DENV      | Waggoner, et al. <i>Emerg Infec Dis.</i> 2016 22(7):1295-1297               |
| Mayaro real-time RT-qPCR        | MAYV                   | Gomes Naveca, et al. <i>Mem Inst Oswaldo Cruz</i> . 2017 Jul;112(7):510-513 |
| DENV non-structural protein 1   | DENV                   | Abbott RDT                                                                  |
| Anti-DENV IgM                   | DENV                   | Abbott RDT                                                                  |
| Anti -DENV IgG                  | DENV                   | Abbott RDT                                                                  |
| Hepatitis B virus surface Ag    | Hepatitis B virus      | Abbott Architect                                                            |
| Anti-hepatitis C virus antibody | Hepatitis C virus      | Abbott Architect                                                            |
| Malaria qPCR                    | <i>Plasmodium</i> spp. | Kamau, et al. <i>PLoS One.</i> 2013 29;8(8):e71539                          |
| Malaria antigen                 | <i>P. vivax</i>        | Abbott RDT                                                                  |
| Leptospira qPCR                 | <i>Leptospira</i> spp. | Waggoner et al. <i>J Clin Microbiol.</i> 2014 Jun;52(6):2011-8              |

OROV, Oropouche virus; ZIKV, Zika virus; CHIKV, Chikungunya virus; MAYV, Mayaro virus; RDT, rapid diagnostic test.

**Table 2.** Clinical manifestations of the OROV cases in Leticia municipality, Colombia, 2024.

|            | OROV <sub>PE-CO-EC/2008-2021</sub> N=6 (No.) | OROV <sub>BR-2015-2023</sub> N=2 (No.) |
|------------|----------------------------------------------|----------------------------------------|
| Fever      | 1                                            | 1                                      |
| Headache   | 6                                            | 2                                      |
| Myalgia    | 5                                            | 2                                      |
| Arthralgia | 6                                            | 1                                      |
| Chills     | 3                                            | 0                                      |
| Fatigue    | 5                                            | 2                                      |
| Rash       | 1                                            | 0                                      |
| Diarrhea   | 3                                            | 1                                      |

OROV, Oropouche virus.

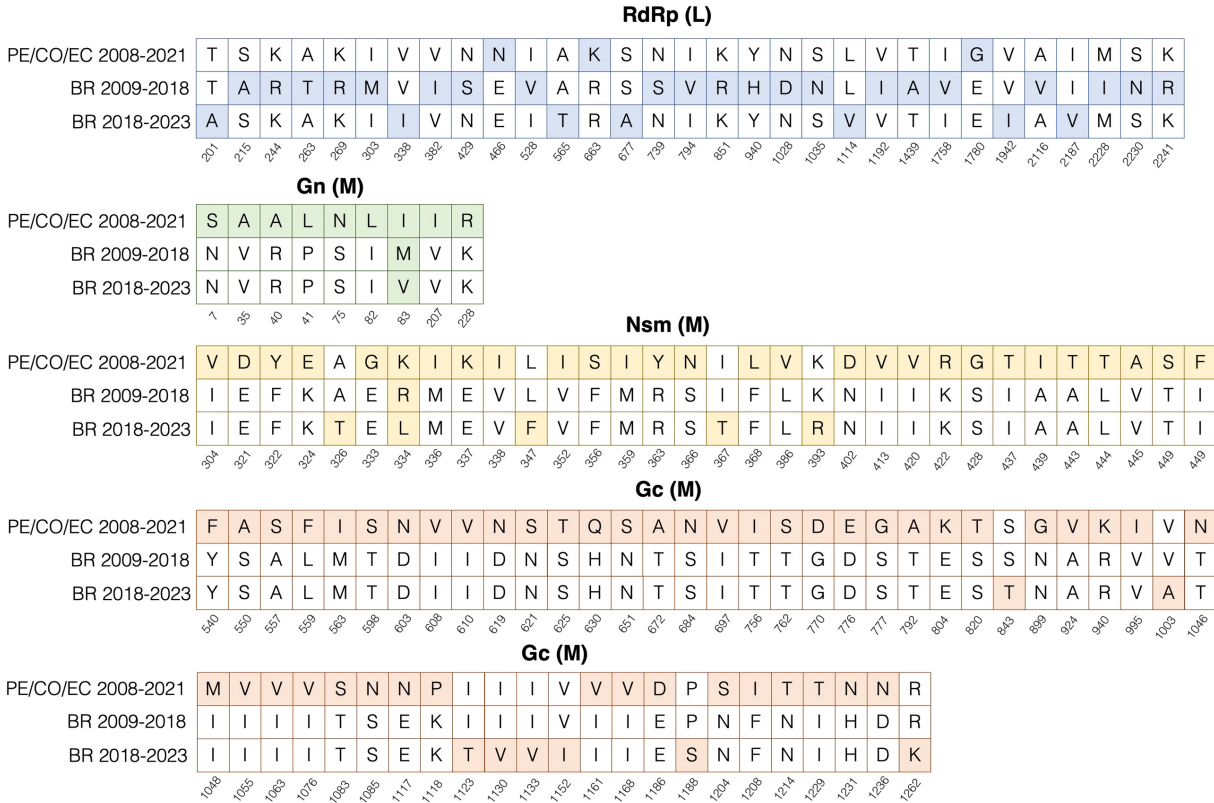

**Figure 1.** Amino acid substitutions in OROV lineages. Amino acid changes found in the virus proteins across three major clades of OROV, PE/CO/EC 2008-2021, BR 2009-2018, and the novel BR 2018-2023 lineage, are shown. A total of 31 changes were observed in the RdRp (L), 9 in Gn (M), 32 in Nsm (M), and 55 in Gc (M). No amino acid changes were found in the S segment. The representative strains for each lineage were determined by calculating the consensus sequence from the respective group of sequences within each lineage.
